# Supplementary material for: SWR1 chromatin remodeling complex prevents mitotic slippage during spindle position checkpoint arrest
Source: PubMed Central journal article supplement — Mol Biol Cell. 2023 Jan 13;34(2):ar11. doi: 10.1091/mbc.E20-03-0179 (PMC9930528; doi:10.1091/mbc.e20-03-0179), 2023-01-13
Supplement: mbc-34-ar11-s001.pdf [file mbc-34-ar11-s001.pdf]

Supplementary Materials  
*Molecular Biology of the Cell*  
Caydasi *et al.*

## **Supplementary Data**

### **SWR1 Chromatin Remodeling Complex Prevents Mitotic Slippage during Spindle Position Checkpoint Arrest**

Ayse Koca Caydasi, Anton Khmelinskii, Zoulfia Darieva, Bahtiyar Kurtulmus, Michael Knop and Gislene Pereira

|             |                                                   | number of genes |
|-------------|---------------------------------------------------|-----------------|
| SGA hits    | Total number                                      | 100             |
|             | GO: mitochondria, ribosome, t-RNA, galactose met. | 26              |
| manual test | Could not be deleted in another background        | 6               |
|             | Deleted in another background                     | 68              |
|             | Deletion rescues Kin4 overexpression toxicity     | 52              |
|             | Deletion causes reduced Kin4 overexpression       | 8               |
|             | Deletion causes SPOC deficiency                   | 28              |

**Figure S1.** Genome- wide genetic screen to identify gene deletions that rescue the lethality of *KIN4* overexpression lethality and its validation. The table summarizes the number of screen hits and validated results.

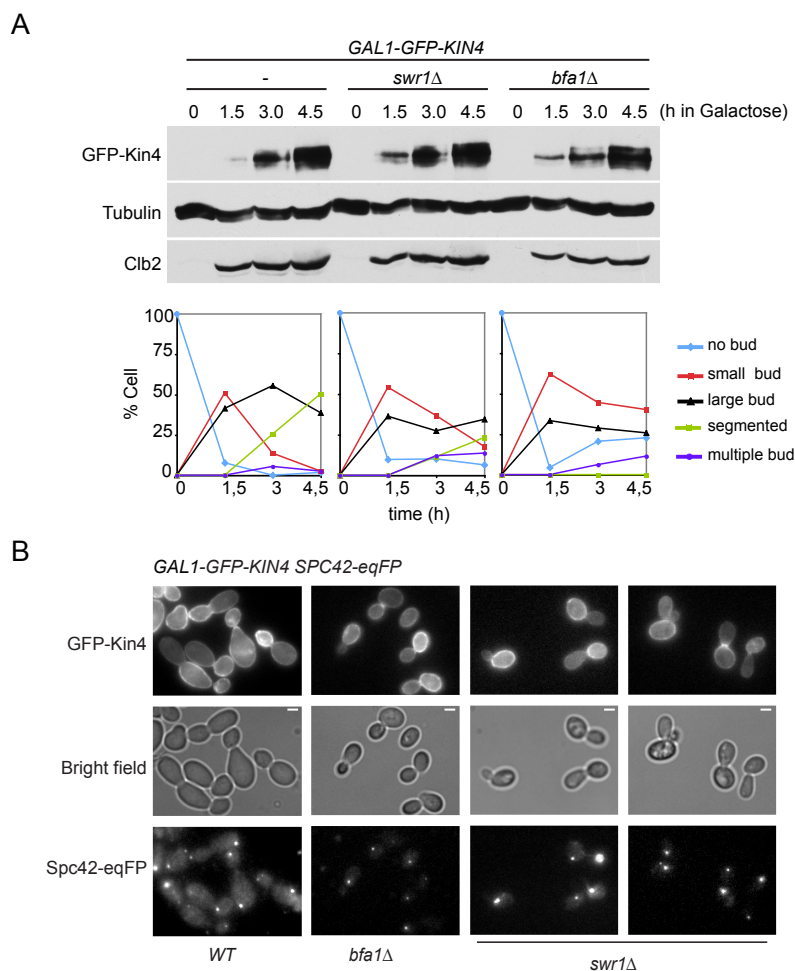

**Figure S2.** *swr1Δ* rescues *KIN4* overexpression lethality. A-B. Cells synchronized in G1 were released in galactose containing medium (t=0) to induce *KIN4* overexpression. Samples were collected as indicated time point for immunoblotting to observe Kin4 and Clb2 levels (A upper panel), for microscopy after DAPI staining to observe budding and chromosome segregation (A lower panel) and for fluorescence microscopy of Kin4-GFP to observe Kin4 localization (B). *GAL1-KIN4* cells arrested as large budded or segmented cells after 4.5 h of *GAL1* induction. Deletion of the target of Kin4 (*bfa1Δ*), abolished this phenotype. After 4.5h of induction *bfa1Δ* cell population was a mixture of non-budded, small budded, large budded and

multi budded cells. Similar to *bfa1Δ*, *swr1Δ* cell population contained non-budded, small budded, large budded and multi budded cells after 4.5h of induction. Differently from *bfa1Δ*, *swr1Δ* population also had a pool of segmented cells, albeit to a lesser extent than *SWR1* cells.

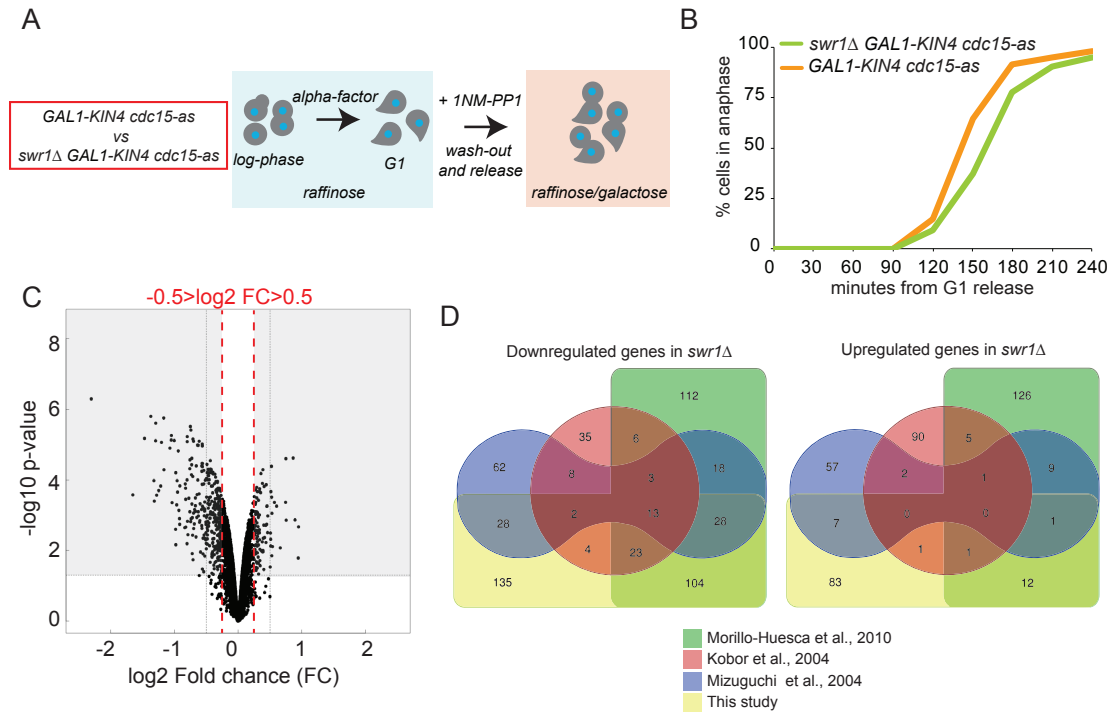

**Figure S3.** Analysis of *SWR1* dependent gene expression in anaphase arrested cells. A. Schematic diagram of the experimental setup. B. The graph shows the percentage of anaphase cells in the experiment depicted in A. At least 100 cells were counted at each timepoint. Cells in anaphase were scored based on separated nuclei in cells after staining of the cells with DAPI. Cells from the 240 min were collected for microarray analysis. C. Volcano plot shows the log<sub>2</sub> fold change differences in *SWR1* and *swr1Δ* cells. D. Venn diagram comparing the *SWR1* dependent mRNA changes identified in this study and previous studies.

A

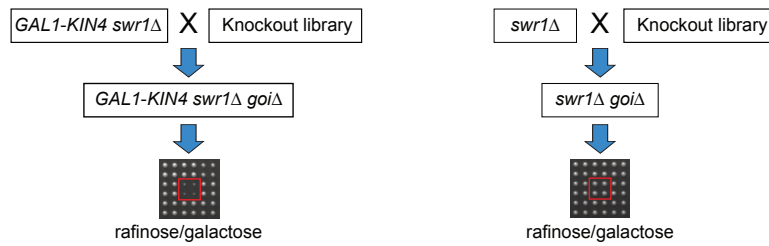

B

|             |                                                                              | number of genes  |   |
|-------------|------------------------------------------------------------------------------|------------------|---|
| SGA         | Hits                                                                         | 69               |   |
|             | Enriched in protein-protein associations                                     | 45               |   |
| manual test | Deleted in another background (at least two genes from each protein complex) | 32               |   |
|             | Deletion synthetic sick with <i>GAL1-KIN4 swr1Δ</i> on raffinose/galactose   | 29               |   |
|             | Deletion rescues SPOC deficiency of <i>swr1Δ</i>                             | strong phenotype | 4 |
|             |                                                                              | weak phenotype   | 2 |

**Figure S4.** SGA screening reveals genes required for mitotic exit in *swr1Δ GAL1-KIN4* cells. A. Schematic representation of the SGA screen. Briefly, gene deletions (gene of interest, *goiΔ*) that diminish the growth of *GAL1-KIN4 swr1Δ* but not of *swr1Δ* on plates containing raffinose/galactose (*GAL1-KIN4* inducing condition) were selected. An example of one gene deletion with the desired phenotype (in quadruplicate) is highlighted in red. B. Summary of number of hits obtained from the SGA screen and validated hits through manual test.

A

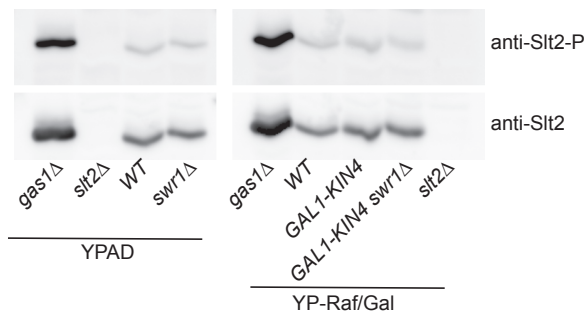

B

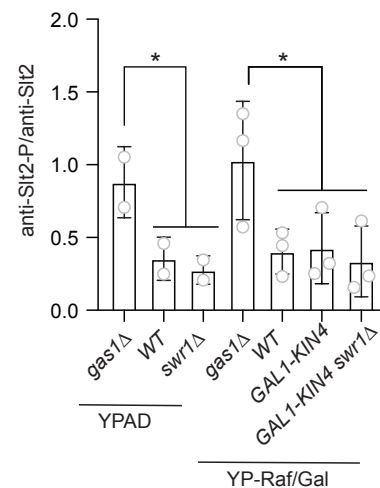

**Figure S5.** Cell wall integrity (CWI) pathway is not activated by Kin4 A. Wild type, *GAL1-KIN4* and *GAL1-KIN4 swr1Δ* carrying cells were grown in glucose (YPAD) or galactose (YP-Raf/Gal) media to repress or induce Kin4 overproduction, respectively. Active Slt2 (Phosphorylated Slt2, Slt2-P) and Slt2 total protein levels were analyzed by immunoblotting. *gas1Δ* cells were used as a control for CWI hyperactivation (enhanced Slt2 protein levels and phosphorylation), whereas *slt2Δ* cells served as a control for antibody specificity. B.

Quantification of A showing the normalized ratio of phospho-Slt2 to total Slt2 from three independent experiments. Error bars are standard deviation. One-way Anova test was performed. \* $p < 0.05$ .

**Supplementary Tables and linked Data Sets:**

**Supplementary Table 1.** Top 100 hits of the SGA screen which identified gene deletions that rescue the lethality of *KIN4* overexpression. (Linked data: **Data Set 1.** Source data for Supplementary Table 1)

**Supplementary Table 2.** Validation of the hits of the screen results presented in Supplementary Table 1. (Linked data: **Data Set 2.** Source data for Supplementary Table 2.)

**Supplementary Table 3.** Up and down regulated genes in *GAL1-Kin4 cdc15-as swr1Δ* cells in comparison to *GAL1-Kin4 cdc15-as SWR1* cells. (Linked data: **Data Set 3.** Source data for Supplementary Table 3.)

**Supplementary Table 4.** Gene ontology analysis of differentially regulated mRNAs by SWR1-C. (Linked data: **Data Set 4.** Source data for Supplementary Table 4.)

**Supplementary Table 5.** Raw data and hits of the SGA screen which identified gene deletions that cause lethality of *KIN4* overexpression in *swr1Δ* background. (Linked data: **Data Set 5.** Source data for Supplementary Table 5.)

**Supplementary Table 6.** Validation of the hits of the screen results presented in Supplementary Table 5. (Linked data: **Data Set 6.** Source data for Supplementary Table 6.)

**Supplementary Table 7.** Table of strains used in the study.

**Supplementary Table 1.** Top 100 hits of the SGA screen which identified gene deletions that rescue the lethality of KIN4 overexpression.

| ranking# | median growth<br>on galactose | ORF<br>systematic name | standard<br>name |
|----------|-------------------------------|------------------------|------------------|
| 1        | 3,545454545                   | YJR053W                | BFA1             |
| 2        | 2,93                          | YMR055C                | BUB2             |
| 3        | 2,784090909                   | YGR063C                | SPT4             |
| 4        | 2,761363636                   | YJR052W                | RAD7             |
| 5        | 2,75                          | YER177W                | BMH1             |
| 6        | 2,545454545                   | YML041C                | VPS71            |
| 7        | 2,46                          | YOR233W                | KIN4             |
| 8        | 2,3                           | YGR064W                | YGR064W          |
| 9        | 2,3                           | YOL012C                | HTZ1             |
| 10       | 2,23                          | YPL248C                | GAL4             |
| 11       | 2,169811321                   | YOR014W                | RTS1             |
| 12       | 2,145833333                   | YDL005C                | MED2             |
| 13       | 2,094339623                   | YNL306W                | MRPS18           |
| 14       | 2,046296296                   | YDR009W                | GAL3             |
| 15       | 1,969387755                   | YFL001W                | DEG1             |
| 16       | 1,965909091                   | YPL049C                | DIG1             |
| 17       | 1,958333333                   | YDR485C                | VPS72            |
| 18       | 1,938596491                   | YAL011W                | SWC3             |
| 19       | 1,925925926                   | YGL025C                | PGD1             |
| 20       | 1,90625                       | YDR293C                | SSD1             |
| 21       | 1,905660377                   | YLR085C                | ARP6             |
| 22       | 1,9                           | YOL050C                | YOL050C          |
| 23       | 1,897727273                   | YMR116C                | ASC1             |
| 24       | 1,850877193                   | YDR334W                | SWR1             |
| 25       | 1,84                          | YOR187W                | TUF1             |
| 26       | 1,836734694                   | YNL107W                | YAF9             |
| 27       | 1,820754717                   | YNL307C                | MCK1             |
| 28       | 1,791666667                   | YBR231C                | SWC5             |
| 29       | 1,785714286                   | YNR052C                | POP2             |
| 30       | 1,772727273                   | YJR043C                | POL32            |
| 31       | 1,77                          | YNR051C                | BRE5             |
| 32       | 1,766666667                   | YGR076C                | MRPL25           |
| 33       | 1,739583333                   | YBR251W                | MRPS5            |
| 34       | 1,738636364                   | YML119W                | YML119W          |
| 35       | 1,727272727                   | YPL040C                | ISM1             |
| 36       | 1,685185185                   | YDR075W                | PPH3             |
| 37       | 1,669811321                   | YNL064C                | YDJ1             |
| 38       | 1,666666667                   | YBR078W                | ECM33            |
| 39       | 1,659090909                   | YMR198W                | CIK1             |
| 40       | 1,65625                       | YDR435C                | PPM1             |
| 41       | 1,632075472                   | YMR307W                | GAS1             |
| 42       | 1,62745098                    | YLR081W                | GAL2             |
| 43       | 1,625                         | YHR191C                | CTF8             |
| 44       | 1,603773585                   | YNL185C                | MRPL19           |
| 45       | 1,602272727                   | YPL008W                | CHL1             |
| 46       | 1,594339623                   | YNL177C                | MRPL22           |
| 47       | 1,583333333                   | YDR506C                | GMC1             |
| 48       | 1,575471698                   | YNR036C                | YNR036C          |
| 49       | 1,5625                        | YCL016C                | DCC1             |
| 50       | 1,56122449                    | YAL040C                | CLN3             |
| 51       | 1,556818182                   | YBR140C                | IRA1             |
| 52       | 1,556603774                   | YLR420W                | URA4             |
| 53       | 1,554347826                   | YIL069C                | RPS24B           |
| 54       | 1,547169811                   | YOR023C                | AHC1             |
| 55       | 1,546296296                   | YCR077C                | PAT1             |
| 56       | 1,546296296                   | YPR100W                | MRPL51           |
| 57       | 1,544444444                   | YGR010W                | NMA2             |
| 58       | 1,544444444                   | YER050C                | RSM18            |
| 59       | 1,543478261                   | YIL141W                | YIL141W          |
| 60       | 1,540816327                   | YGL190C                | CDC55            |
| 61       | 1,537735849                   | YNR037C                | RSM19            |
| 62       | 1,534090909                   | YER111C                | SWI4             |
| 63       | 1,533333333                   | YGR171C                | MSM1             |
| 64       | 1,530612245                   | YDR174W                | HMO1             |
| 65       | 1,53                          | YER167W                | BCK2             |
| 66       | 1,52                          | YER151C                | UBP3             |
| 67       | 1,518518519                   | YNL201C                | PSY2             |



|     |             |           |           |
|-----|-------------|-----------|-----------|
| 68  | 1,510869565 | YIL093C   | RSM25     |
| 69  | 1,488888889 | YGL107C   | RMD9      |
| 70  | 1,479166667 | YDR156W   | RPA14     |
| 71  | 1,473684211 | YPL152W   | RRD2      |
| 72  | 1,472222222 | YJL124C   | LSM1      |
| 73  | 1,456521739 | YGR215W   | RSM27     |
| 74  | 1,454545455 | YJR074W   | MOG1      |
| 75  | 1,453703704 | YKL113C   | RAD27     |
| 76  | 1,453703704 | YKR029C   | SET3      |
| 77  | 1,448979592 | YBL071C   | YBL071C   |
| 78  | 1,447916667 | YDL134C   | PPH21     |
| 79  | 1,443396226 | YOR158W   | PET123    |
| 80  | 1,44        | YPL097W   | MSY1      |
| 81  | 1,433962264 | YNL235C   | YNL235C   |
| 82  | 1,433333333 | YGL173C   | KEM1      |
| 83  | 1,433333333 | YGL194C   | HOS2      |
| 84  | 1,431818182 | YPR084W   | YPR084W   |
| 85  | 1,43        | YOR144C   | ELG1      |
| 86  | 1,41509434  | YMR143W   | RPS16A    |
| 87  | 1,409090909 | YMR078C   | CTF18     |
| 88  | 1,408163265 | YBL071C-B | YBL071C-B |
| 89  | 1,408163265 | YDR079C-A | TFB5      |
| 90  | 1,4         | YER155C   | BEM2      |
| 91  | 1,396226415 | YNR032W   | PPG1      |
| 92  | 1,395833333 | YDL124W   | YDL124W   |
| 93  | 1,388888889 | YAL004W   | YAL004W   |
| 94  | 1,387755102 | YNL096C   | RPS7B     |
| 95  | 1,386363636 | YML109W   | ZDS2      |
| 96  | 1,386363636 | YPR132W   | RPS23B    |
| 97  | 1,385416667 | YDR010C   | YDR010C   |
| 98  | 1,385416667 | YDR360W   | OPI7      |
| 99  | 1,380434783 | YIL076W   | SEC28     |
| 100 | 1,38        | YKR082W   | NUP133    |

**Supplementary Table 2.** Validation of the hits of the screen results presented in Supplementary Table 1.

| RANKING<br>IN THE<br>SGA SCREEN | GOI              | TESTED MANUALLY USING HOME MADE STRAINS                              |                                                                                  |                                                                         |
|---------------------------------|------------------|----------------------------------------------------------------------|----------------------------------------------------------------------------------|-------------------------------------------------------------------------|
|                                 |                  | <i>GAL1-KIN4</i> <i>goi</i> $\Delta$<br>Grows on RafGAL<br>Yes or NO | <i>KIN4</i><br>Over expression<br>LEVELS in <i>GAL1-KIN4</i> <i>goi</i> $\Delta$ | <i>goi</i> $\Delta$ <i>kar9</i> $\Delta$<br>SPOC deficient<br>Yes or NO |
| 1                               | BFA1             | YES                                                                  | High                                                                             | YES                                                                     |
| 2                               | BUB2             | YES                                                                  | High                                                                             | YES                                                                     |
| 9                               | HTZ1             | YES                                                                  | High                                                                             | YES                                                                     |
| 26                              | YAF9             | YES                                                                  | High                                                                             | YES                                                                     |
| 7                               | KIN4             | YES                                                                  | Reduced                                                                          | YES                                                                     |
| 5                               | BMH1             | YES                                                                  | High                                                                             | YES                                                                     |
| 18                              | SWC3             | YES                                                                  | High                                                                             | YES                                                                     |
| 24                              | SWR1             | YES                                                                  | High                                                                             | YES                                                                     |
| 28                              | SWC5             | YES                                                                  | High                                                                             | YES                                                                     |
| 6                               | VPS71/SWC6       | YES                                                                  | High                                                                             | YES                                                                     |
| 21                              | ARP6             | YES                                                                  | High                                                                             | YES                                                                     |
| 39                              | CIK1             | YES                                                                  | High                                                                             | YES                                                                     |
| 17                              | VPS72/SWC2       | YES                                                                  | High                                                                             | YES                                                                     |
| 11                              | RTS1             | YES                                                                  | High                                                                             | YES                                                                     |
| 83                              | HOS2             | YES                                                                  | High                                                                             | YES                                                                     |
| 71                              | RRD2             | YES                                                                  | High                                                                             | YES                                                                     |
| 27                              | MCK1             | YES                                                                  | High                                                                             | YES                                                                     |
| 49                              | DCC1             | YES                                                                  | High                                                                             | YES                                                                     |
| 36                              | PPH3             | YES                                                                  | High                                                                             | YES                                                                     |
| 43                              | CTF8             | YES                                                                  | High                                                                             | YES                                                                     |
| 87                              | CTF18            | YES/NO                                                               | High                                                                             | YES                                                                     |
| 45                              | CHL1             | YES                                                                  | High                                                                             | YES                                                                     |
| 69                              | RMD9             | YES                                                                  | High                                                                             | YES                                                                     |
| 98                              | OPI7             | YES                                                                  | High                                                                             | YES                                                                     |
| 72                              | LSM1             | NO                                                                   | High                                                                             | YES                                                                     |
| 100                             | NUP133           | YES                                                                  | High                                                                             | YES                                                                     |
| 78                              | PPH21            | YES                                                                  | High                                                                             | YES                                                                     |
| 60                              | CDC55            | YES                                                                  | High                                                                             | YES                                                                     |
| 30                              | POL32            | NO                                                                   | High                                                                             | NO*                                                                     |
| 76                              | SET3             | YES                                                                  | High                                                                             | NO*                                                                     |
| 31                              | BRE5             | YES                                                                  | High                                                                             | NO*                                                                     |
| 74                              | MOG1             | YES                                                                  | High                                                                             | NO*                                                                     |
| 67                              | PSY2             | YES                                                                  | High                                                                             | NO*                                                                     |
| 82                              | KEM1             | YES                                                                  | High                                                                             | NO*                                                                     |
| 85                              | ELG1             | NO                                                                   | High                                                                             | NO*                                                                     |
| 54                              | AHC1             | YES                                                                  | High                                                                             | NO*                                                                     |
| 40                              | PPM1             | YES                                                                  | High                                                                             | NO                                                                      |
| 84                              | YPR084W          | YES                                                                  | High                                                                             | NO                                                                      |
| 34                              | YML119W          | YES                                                                  | High                                                                             | NO                                                                      |
| 20                              | SSD1             | YES                                                                  | High                                                                             | NO                                                                      |
| 50                              | CLN3             | NO                                                                   | High                                                                             | NO                                                                      |
| 64                              | HMO1             | YES                                                                  | reduced                                                                          | NO                                                                      |
| 65                              | BCK2             | YES                                                                  | High                                                                             | NO                                                                      |
| 4                               | RAD7             | YES                                                                  | High                                                                             | NO                                                                      |
| 47                              | GMC1             | NO                                                                   | High                                                                             | NO                                                                      |
| 92                              | YDL124W          | NO                                                                   | High                                                                             | NO                                                                      |
| 91                              | PPG1             | YES                                                                  | High                                                                             | NO                                                                      |
| 66                              | UBP3             | NO                                                                   | High                                                                             | NO                                                                      |
| 16                              | DIG1             | YES                                                                  | High                                                                             | NO                                                                      |
| 77                              | YBL071C          | NO                                                                   | High                                                                             | NO                                                                      |
| 93                              | YAL004W          | YES                                                                  | High                                                                             | NO                                                                      |
| 62                              | SWI4             | NO                                                                   | High                                                                             | NO                                                                      |
| 38                              | ECM33            | YES                                                                  | High                                                                             | NO                                                                      |
| N/A                             | no gene deletion | NO                                                                   | High                                                                             | NO                                                                      |
| 70                              | RPA14            | YES                                                                  | High                                                                             | NO                                                                      |
| 88                              | YBL071C-B        | YES                                                                  | High                                                                             | NO                                                                      |
| 95                              | ZDS2             | YES                                                                  | High                                                                             | NO                                                                      |

|    |         |     |         |     |
|----|---------|-----|---------|-----|
| 99 | SEC28   | NO  | High    | NO  |
| 51 | IRA1    | NO  | High    | NO  |
| 97 | YDR010C | NO  | High    | NO  |
| 59 | YIL141W | YES | High    | NO  |
| 81 | YNL235C | NO  | High    | NO  |
| 41 | GAS1    | YES | reduced | NO  |
| 3  | SPT4    | YES | reduced | NO  |
| 37 | YDJ1    | N/A | reduced | NO  |
| 23 | ASC1    | NO  | reduced | NO  |
| 19 | PGD1    | YES | reduced | NO  |
| 12 | MED2    | YES | reduced | NO  |
| 75 | RAD27   | N/A | High    | N/A |
| 10 | GAL4    | N/A | N/A     | NO  |
| 13 | MRPS18  | N/A | N/A     | N/A |
| 14 | GAL3    | N/A | N/A     | N/A |
| 15 | DEG1    | N/A | N/A     | N/A |
| 22 | YOL050C | N/A | N/A     | N/A |
| 25 | TUF1    | N/A | N/A     | N/A |
| 29 | POP2    | N/A | N/A     | N/A |
| 32 | MRPL25  | N/A | N/A     | N/A |
| 33 | MRPS5   | N/A | N/A     | N/A |
| 35 | ISM1    | N/A | N/A     | N/A |
| 42 | GAL2    | N/A | N/A     | N/A |
| 44 | MRPL19  | N/A | N/A     | N/A |
| 46 | MRPL22  | N/A | N/A     | N/A |
| 48 | YNR036C | N/A | N/A     | N/A |
| 52 | URA4    | N/A | N/A     | N/A |
| 53 | RPS24B  | N/A | N/A     | N/A |
| 55 | PAT1    | N/A | N/A     | N/A |
| 56 | MRPL51  | N/A | N/A     | N/A |
| 57 | NMA2    | N/A | N/A     | N/A |
| 58 | RSM18   | N/A | N/A     | N/A |
| 61 | RSM19   | N/A | N/A     | N/A |
| 63 | MSM1    | N/A | N/A     | N/A |
| 68 | RSM25   | N/A | N/A     | N/A |
| 73 | RSM27   | N/A | N/A     | N/A |
| 79 | PET123  | N/A | N/A     | N/A |
| 80 | MSY1    | N/A | N/A     | N/A |
| 86 | RPS16A  | N/A | N/A     | N/A |
| 89 | TFB5    | N/A | N/A     | N/A |
| 90 | BEM2    | N/A | N/A     | N/A |
| 94 | RPS7B   | N/A | N/A     | N/A |
| 96 | RPS23B  | N/A | N/A     | N/A |

\* On the threshold of SPOC deficiency indexed. We considered this not to be SPOC deficient.

**Supplementary Table 3. Genes up and down regulated in *swr1*Δ**

| Downregulated genes  |            | Upregulated genes    |            |
|----------------------|------------|----------------------|------------|
| Gene systematic name | LogFC      | Gene systematic name | LogFC      |
| YDR334W              | -6,5385734 | YJR153W              | 1,89654327 |
| YHR184W              | -4,6075621 | YMR095C              | 1,88707607 |
| YEL059C-A            | -3,3038993 | YCR021C              | 1,78595209 |
| YAR033W              | -2,9368566 | YNL300W              | 1,72745131 |
| YIL013C              | -2,7390804 | YJL213W              | 1,50835455 |
| YPL189W              | -2,6421211 | YBR072W              | 1,49914396 |
| YKL178C              | -2,6297841 | YPR194C              | 1,49000952 |
| YAR028W              | -2,5888564 | YBL049W              | 1,32325826 |
| YAR031W              | -2,5853051 | YER124C              | 1,20813507 |
| YAR029W              | -2,5565396 | YAR073W              | 1,13898852 |
| YGR053C              | -2,4918456 | YIL057C              | 1,0791942  |
| YAL063C-A            | -2,4295133 | YOR348C              | 1,06286147 |
| YFR012W-A            | -2,4040897 | YOR388C              | 1,05715801 |
| YHR015W              | -2,3341142 | YHL021C              | 1,05355814 |
| YNL234W              | -2,327311  | YER067W              | 1,04730645 |
| YAR033W              | -2,1403547 | YGL184C              | 1,02896632 |
| YCR106W              | -2,0990118 | YDR171W              | 1,02274105 |
| YCL073C              | -2,0927819 | YMR096W              | 1,02262156 |
| YMR101C              | -2,0725517 | YOL052C-A            | 1,01666898 |
| YGL081W              | -2,003568  | YBR294W              | 1,00691486 |
| YDL246C              | -1,9615132 | YKL217W              | 0,93074219 |
| YOR011W              | -1,9563478 | YOL119C              | 0,92512269 |
| YFL011W              | -1,9548213 | YMR013W-A            | 0,90918741 |
| YIL172C              | -1,9265365 | YOR221C              | 0,89949942 |
| YHL044W              | -1,9143621 | YPL250C              | 0,89630726 |
| YDL218W              | -1,9002999 | YLR438W              | 0,88265562 |
| YDR541C              | -1,8777219 | YNL279W              | 0,8745618  |
| YFR012W              | -1,8593011 | YHR216W              | 0,86697536 |
| YCR099C              | -1,8384004 | YCL027W              | 0,8299007  |
| YER028C              | -1,8330761 | YPL163C              | 0,81583393 |
| YIR042C              | -1,8282732 | YBR040W              | 0,8071526  |
| YER060W              | -1,6737514 | YLR042C              | 0,80652245 |
| YFR023W              | -1,6581395 | YNL277W              | 0,78910618 |
| YHR202W              | -1,6483582 | YGR224W              | 0,78397083 |
| YGR052W              | -1,6450783 | YML047C              | 0,77957746 |
| YMR319C              | -1,6422461 | YLL057C              | 0,77847817 |
| YHL028W              | -1,6030227 | YFL014W              | 0,76962798 |
| YCR107W              | -1,6021723 | YGR040W              | 0,76248201 |
| YHR054C              | -1,5972795 | YMR118C              | 0,75781799 |
| YMR207C              | -1,5961434 | YBR047W              | 0,73459516 |
| YHR140W              | -1,5890061 | YOL007C              | 0,71673473 |
| YNL012W              | -1,5749289 | YIR017C              | 0,70636708 |
| YAL068C              | -1,5459296 | YJL133C-A            | 0,69255106 |
| YNR057C              | -1,5163844 | YNR044W              | 0,68466146 |
| YDL244W              | -1,5143955 | YNR034W-A            | 0,68363664 |
| YKL187C              | -1,5114476 | YLR089C              | 0,67643363 |
| YDR403W              | -1,4883783 | YER079W              | 0,67599876 |
| YMR138W              | -1,4812614 | YNL146C-A            | 0,67398099 |
| YPR007C              | -1,4746866 | YJR149W              | 0,66919032 |
| YJL219W              | -1,4635751 | YKR013W              | 0,66862619 |
| YER096W              | -1,4571513 | YDR380W              | 0,66647875 |
| YLL042C              | -1,4522596 | YGL117W              | 0,65699802 |
| YIL176C              | -1,4500663 | YNR060W              | 0,64419919 |
| YER187W              | -1,4401831 | YIL121W              | 0,64121815 |
| YDR317W              | -1,4361042 | YGL032C              | 0,63974239 |
| YER106W              | -1,4283661 | YOR273C              | 0,63780162 |
| YLR307W              | -1,4223638 | YMR056C              | 0,63585355 |
| YAL049C              | -1,4169576 | YBL005W-A            | 0,62912217 |
| YGR249W              | -1,4145937 | YHL024W              | 0,62745929 |
| YCR098C              | -1,3992913 | YLR286C              | 0,62561285 |
| YIR030C              | -1,3984676 | YHR143W              | 0,61382921 |
| YOR032W-A            | -1,3947248 | YOR193W              | 0,61125659 |
| YLR461W              | -1,3737473 | YPR167C              | 0,61085467 |
| YOL152W              | -1,3649081 | YMR042W              | 0,60577182 |
| YLL064C              | -1,340542  | YBR067C              | 0,60565724 |
| YHR160C              | -1,34      | YCL030C              | 0,60517029 |

|           |            |
|-----------|------------|
| YAL067C   | -1,3390878 |
| YGR174W-A | -1,3205817 |
| YGR059W   | -1,2958727 |
| YLR040C   | -1,2867513 |
| YIR014W   | -1,2732854 |
| YKL071W   | -1,2652221 |
| YBR184W   | -1,252072  |
| YPL222W   | -1,2508471 |
| YFL003C   | -1,245862  |
| YIL120W   | -1,2236276 |
| YJR118C   | -1,2211431 |
| YJL218W   | -1,2099693 |
| YPR193C   | -1,1999785 |
| YMR323W   | -1,1929296 |
| YOL084W   | -1,1793757 |
| YOL156W   | -1,1410139 |
| YER014W   | -1,1399669 |
| YKL018C-A | -1,1399297 |
| YOR394W   | -1,1349084 |
| YGR263C   | -1,1313523 |
| YIL139C   | -1,1286192 |
| YHR053C   | -1,1250637 |
| YIL024C   | -1,1224717 |
| YMR174C   | -1,1208188 |
| YGR206W   | -1,1201421 |
| YDR414C   | -1,1191345 |
| YIL085C   | -1,1163246 |
| YAL037W   | -1,1090691 |
| YOL083W   | -1,1012543 |
| YHL012W   | -1,0993357 |
| YGL033W   | -1,0789793 |
| YFR047C   | -1,0772107 |
| YOL163W   | -1,0677414 |
| YHR153C   | -1,0634866 |
| YCL048W   | -1,0543301 |
| YGL157W   | -1,0531725 |
| YCR100C   | -1,0476346 |
| YDR506C   | -1,0468399 |
| YNL014W   | -1,0455845 |
| YDR540C   | -1,0309612 |
| YOR389W   | -1,0176178 |
| YLR080W   | -1,0121557 |
| YBR240C   | -1,0117179 |
| YJL105W   | -1,0088679 |
| YJL037W   | -1,0009966 |
| YKR097W   | -0,9978225 |
| YGR225W   | -0,9953216 |
| YHR057C   | -0,9915452 |
| YEL070W   | -0,98921   |
| YHR176W   | -0,9768496 |
| YLR423C   | -0,9712886 |
| YGL258W   | -0,9704015 |
| YAL064W   | -0,9687102 |
| YMR018W   | -0,9674251 |
| YER001W   | -0,9654614 |
| YPL277C   | -0,9611497 |
| YHR048W   | -0,9555633 |
| YPL278C   | -0,9546064 |
| YIR027C   | -0,9544042 |
| YLR265C   | -0,9517287 |
| YOR012W   | -0,9483636 |
| YIL011W   | -0,9399421 |
| YOR280C   | -0,9371298 |
| YDL210W   | -0,9362812 |
| YER037W   | -0,9349547 |
| YOR336W   | -0,926405  |
| YIL173W   | -0,9250223 |
| YCR105W   | -0,9230744 |
| YJL132W   | -0,9147143 |

|           |            |
|-----------|------------|
| YJR148W   | 0,60114214 |
| YBR208C   | 0,59986828 |
| YOL164W   | 0,59190124 |
| YNL042W-B | 0,58667671 |
| YHR018C   | 0,58550048 |
| YDR253C   | 0,58478131 |
| YNL046W   | 0,58459257 |
| YMR194C-B | 0,58404194 |
| YJR010W   | 0,58141086 |
| YLR452C   | 0,57934593 |
| YJR025C   | 0,57691598 |
| YML007C-A | 0,57199132 |
| YBR083W   | 0,57025963 |
| YLR329W   | 0,56546615 |
| YDR256C   | 0,5612172  |
| YMR244C-A | 0,55421996 |
| YER180C-A | 0,54940837 |
| YBL075C   | 0,54835129 |
| YLR154W-E | 0,54517035 |
| YGL125W   | 0,54506462 |
| YCR037C   | 0,54392192 |
| YER175C   | 0,54346071 |
| YPL192C   | 0,54338988 |
| YLR437C   | 0,54235108 |
| YGR142W   | 0,53890558 |
| YDL222C   | 0,53648438 |
| YLR090W   | 0,53439653 |
| YGR006W   | 0,53252395 |
| YJR086W   | 0,52987801 |
| YHR137W   | 0,52696991 |
| YMR170C   | 0,52422979 |
| YLR193C   | 0,52098665 |
| YDR461W   | 0,51560972 |
| YOR201C   | 0,50770794 |
| YDR345C   | 0,50765371 |
| YER081W   | 0,50751337 |
| YGR121C   | 0,50716322 |
| YOR377W   | 0,5015104  |
| YJR109C   | 0,50129658 |

|           |            |
|-----------|------------|
| YFL059W   | -0,914592  |
| YOR265W   | -0,9097838 |
| YDR031W   | -0,9062311 |
| YDR367W   | -0,9046827 |
| YOR028C   | -0,9036168 |
| YBR148W   | -0,8951475 |
| YOL159C   | -0,8890882 |
| YFL060C   | -0,8774722 |
| YDR488C   | -0,8762823 |
| YMR282C   | -0,8758266 |
| YDL039C   | -0,8757213 |
| YMR025W   | -0,8711721 |
| YER115C   | -0,8693665 |
| YOL102C   | -0,8693037 |
| YJR036C   | -0,8628285 |
| YGL176C   | -0,8614619 |
| YIL165C   | -0,8513302 |
| YOL065C   | -0,844435  |
| YGL158W   | -0,8434555 |
| YDL093W   | -0,8402838 |
| YDL091C   | -0,8377156 |
| YNR074C   | -0,8344569 |
| YIL072W   | -0,8288043 |
| YPL165C   | -0,8256284 |
| YEL016C   | -0,8222012 |
| YKL084W   | -0,8221789 |
| YCR104W   | -0,8187336 |
| YBR054W   | -0,8185896 |
| YNR075W   | -0,8148899 |
| YDR131C   | -0,8138919 |
| YDR030C   | -0,8073936 |
| YDL206W   | -0,8062287 |
| YMR120C   | -0,8014758 |
| YGR066C   | -0,8002204 |
| YPL041C   | -0,798758  |
| YDL169C   | -0,7923561 |
| YOL096C   | -0,7913625 |
| YMR017W   | -0,7839113 |
| YBR250W   | -0,7838547 |
| YGL175C   | -0,7799963 |
| YOL159C-A | -0,779477  |
| YKL133C   | -0,7714711 |
| YOL015W   | -0,7670922 |
| YOR107W   | -0,7616232 |
| YML037C   | -0,7599629 |
| YNL128W   | -0,7597865 |
| YJL216C   | -0,7501661 |
| YNL195C   | -0,749173  |
| YOR306C   | -0,746923  |
| YOL162W   | -0,7457476 |
| YPL040C   | -0,7436372 |
| YFL020C   | -0,7425835 |
| YNL040W   | -0,7403562 |
| YIL037C   | -0,7379125 |
| YIR036C   | -0,7355681 |
| YKL218C   | -0,7353634 |
| YCR075W-A | -0,7274257 |
| YDL104C   | -0,7258345 |
| YDL154W   | -0,7248594 |
| YER044C-A | -0,7244206 |
| YLR015W   | -0,7243628 |
| YER014C-A | -0,7238777 |
| YCR102C   | -0,7236722 |
| YLL012W   | -0,7177031 |
| YHL035C   | -0,7153112 |
| YDL149W   | -0,7069972 |
| YIR039C   | -0,7020672 |
| YKR044W   | -0,7013732 |
| YGL243W   | -0,6974974 |

|           |            |
|-----------|------------|
| YGL015C   | -0,6973532 |
| YPR117W   | -0,6952833 |
| YOL155W-A | -0,6929706 |
| YHR035W   | -0,6791498 |
| YHR157W   | -0,678842  |
| YIL003W   | -0,6785145 |
| YNL193W   | -0,6779928 |
| YBR076W   | -0,6764242 |
| YHR075C   | -0,6756944 |
| YJL045W   | -0,6743199 |
| YPR006C   | -0,6683459 |
| YOR328W   | -0,6584678 |
| YMR244W   | -0,6553821 |
| YMR322C   | -0,6545634 |
| YBR201W   | -0,6532274 |
| YKL132C   | -0,6522066 |
| YPR058W   | -0,6502947 |
| YKL134C   | -0,6494774 |
| YDR111C   | -0,6480354 |
| YMR292W   | -0,6468221 |
| YMR106C   | -0,6458555 |
| YEL019C   | -0,6438408 |
| YNL237W   | -0,6405828 |
| YHR210C   | -0,6402836 |
| YOR177C   | -0,6395592 |
| YGL229C   | -0,6390038 |
| YJL131C   | -0,6345492 |
| YCL012C   | -0,6343899 |
| YIR028W   | -0,6293546 |
| YPL264C   | -0,6283318 |
| YNL321W   | -0,6240044 |
| YLR231C   | -0,6229824 |
| YDR147W   | -0,6208159 |
| YHL047C   | -0,6170692 |
| YJL116C   | -0,6166172 |
| YPL096C-A | -0,6159837 |
| YOL158C   | -0,6147814 |
| YDR538W   | -0,6123948 |
| YNL327W   | -0,6123768 |
| YOR378W   | -0,6120364 |
| YNL328C   | -0,6108799 |
| YOR192C   | -0,6095354 |
| YIL164C   | -0,6090352 |
| YDR270W   | -0,6077477 |
| YGR108W   | -0,605489  |
| YMR234W   | -0,6044316 |
| YKR050W   | -0,6028761 |
| YPL194W   | -0,6005777 |
| YAL008W   | -0,5994401 |
| YEL064C   | -0,59822   |
| YDR281C   | -0,5977602 |
| YDR104C   | -0,5968039 |
| YDR236C   | -0,5961996 |
| YOR111W   | -0,5945684 |
| YER060W-A | -0,5926014 |
| YGR110W   | -0,5923455 |
| YMR069W   | -0,5920686 |
| YFL012W   | -0,5893297 |
| YHR076W   | -0,5892859 |
| YDR018C   | -0,5888837 |
| YLL055W   | -0,5844983 |
| YNL273W   | -0,5842511 |
| YML104C   | -0,5835521 |
| YNL217W   | -0,5829715 |
| YGR067C   | -0,5829424 |
| YOR067C   | -0,5828748 |
| YDR434W   | -0,5786731 |
| YBR128C   | -0,5778219 |
| YDL048C   | -0,5768226 |

|           |            |
|-----------|------------|
| YFL055W   | -0,5750546 |
| YPL208W   | -0,5732035 |
| YDR539W   | -0,5709924 |
| YHR022C   | -0,5704936 |
| YLR174W   | -0,5691907 |
| YDR254W   | -0,5672647 |
| YAR035W   | -0,5670323 |
| YJL193W   | -0,563747  |
| YLR214W   | -0,5584862 |
| YDR305C   | -0,5571197 |
| YMR156C   | -0,5551857 |
| YDR518W   | -0,5550451 |
| YHL014C   | -0,5546195 |
| YDR435C   | -0,5542059 |
| YHR033W   | -0,5541266 |
| YBL013W   | -0,5528519 |
| YKR083C   | -0,5524848 |
| YGL121C   | -0,5505397 |
| YKR098C   | -0,5476492 |
| YGR238C   | -0,5470881 |
| YJL016W   | -0,5461001 |
| YBR092C   | -0,5454458 |
| YNL065W   | -0,5446834 |
| YPL060W   | -0,5445991 |
| YHR031C   | -0,5444109 |
| YKL162C   | -0,5423191 |
| YIL067C   | -0,5380421 |
| YGR012W   | -0,535979  |
| YGL247W   | -0,5357961 |
| YPR124W   | -0,5348256 |
| YGR247W   | -0,5339059 |
| YGL263W   | -0,5311969 |
| YML011C   | -0,5308738 |
| YDR125C   | -0,5286618 |
| YER062C   | -0,5252302 |
| YGL053W   | -0,5225029 |
| YBR157C   | -0,5220639 |
| YOR062C   | -0,5217279 |
| YPL067C   | -0,5206887 |
| YEL058W   | -0,51974   |
| YHL017W   | -0,5192369 |
| YMR250W   | -0,5191891 |
| YPR160W   | -0,5190661 |
| YKR088C   | -0,5181238 |
| YKL072W   | -0,5159641 |
| YDR323C   | -0,5152466 |
| YMR301C   | -0,5144405 |
| YER039C-A | -0,514271  |
| YDR107C   | -0,5121477 |
| YPR185W   | -0,5108014 |
| YBL111C   | -0,5099349 |
| YAR023C   | -0,5093924 |
| YIL064W   | -0,5082998 |
| YCL033C   | -0,5082457 |
| YMR035W   | -0,5077941 |
| YNL200C   | -0,5074903 |
| YBR169C   | -0,5071487 |
| YNL223W   | -0,5064901 |
| YLL049W   | -0,5061019 |
| YAL064W-B | -0,504473  |
| YNR063W   | -0,5024867 |
| YBR136W   | -0,5022399 |
| YOR321W   | -0,5019829 |
| YNL173C   | -0,5009126 |
| YDR369C   | -0,5000159 |



**Supplementary Table 4.** Gene ontology analysis of differentially regulated mRNAs by SWR1-C\*.

| Down regulated genes |                                                                             |       |            |            |             |  |
|----------------------|-----------------------------------------------------------------------------|-------|------------|------------|-------------|--|
| GO number            | GO category name                                                            | level | % sample   | % yeast    | p value     |  |
| GO:0055085           | transmembrane transport                                                     | 5     | 9,79228487 | 3,58794674 | 3,15E-08    |  |
| GO:0051321           | meiotic cell cycle                                                          | 3     | 6,23145401 | 1,89208129 | 2,79E-07    |  |
| GO:0016050           | vesicle organization                                                        | 5     | 2,07715134 | 0,26629292 | 1,09E-06    |  |
| GO:0006811           | ion transport                                                               | 5     | 5,34124629 | 1,66783462 | 2,53E-06    |  |
| GO:0030435           | sporulation resulting in formation of a cellular spore                      | 4     | 4,74777448 | 1,52768045 | 1,19E-05    |  |
| GO:0055072           | iron ion homeostasis                                                        | 10    | 2,07715134 | 0,39243167 | 3,09E-05    |  |
| GO:0032120           | ascospore-type prospore membrane assembly                                   | 4     | 1,48367953 | 0,22424667 | 5,68E-05    |  |
| GO:0044718           | siderophore transmembrane transport                                         | 7     | 0,89020772 | 0,0840925  | 6,80E-05    |  |
| GO:0015757           | galactose transmembrane transport                                           | 9     | 0,89020772 | 0,0840925  | 6,80E-05    |  |
| GO:0030476           | ascospore wall assembly                                                     | 4     | 2,67062315 | 0,68675543 | 7,64E-05    |  |
| GO:0015677           | copper ion import                                                           | 10    | 1,18694362 | 0,15416959 | 8,33E-05    |  |
| GO:0044805           | late nucleophagy                                                            | 6     | 1,48367953 | 0,23826209 | 8,44E-05    |  |
| GO:0006825           | copper ion transport                                                        | 9     | 1,18694362 | 0,168185   | 0,000137291 |  |
| GO:0042138           | meiotic DNA double-strand break formation                                   | 5     | 1,18694362 | 0,18220042 | 0,000214505 |  |
| GO:0000422           | autophagy of mitochondrion                                                  | 5     | 2,07715134 | 0,53258584 | 0,000320853 |  |
| GO:0007130           | synaptonemal complex assembly                                               | 5     | 1,18694362 | 0,21023125 | 0,000462764 |  |
| GO:0006879           | cellular iron ion homeostasis                                               | 9     | 2,07715134 | 0,58864751 | 0,000656576 |  |
| GO:0045143           | homologous chromosome segregation                                           | 5     | 0,89020772 | 0,14015417 | 0,000818356 |  |
| GO:0034220           | ion transmembrane transport                                                 | 6     | 0,89020772 | 0,14015417 | 0,000818356 |  |
| GO:0006855           | drug transmembrane transport                                                | 6     | 1,48367953 | 0,35038542 | 0,000875825 |  |
| GO:0034497           | protein localization to phagophore assembly site                            | 6     | 1,18694362 | 0,23826209 | 0,000881814 |  |
| GO:0031505           | fungal-type cell wall organization                                          | 5     | 4,45103858 | 2,03223546 | 0,001278219 |  |
| GO:0009228           | thiamine biosynthetic process                                               | 7     | 0,89020772 | 0,168185   | 0,001788938 |  |
| GO:0007039           | protein catabolic process in the vacuole                                    | 7     | 0,89020772 | 0,168185   | 0,001788938 |  |
| GO:0006486           | protein glycosylation                                                       | 5     | 2,37388724 | 0,86895585 | 0,002324838 |  |
| GO:0055088           | lipid homeostasis                                                           | 6     | 0,89020772 | 0,18220042 | 0,002488686 |  |
| GO:0034727           | piecemeal microautophagy of the nucleus                                     | 6     | 1,78041543 | 0,5746321  | 0,002761475 |  |
| GO:0000723           | telomere maintenance                                                        | 6     | 1,78041543 | 0,60266293 | 0,003650747 |  |
| GO:0006807           | nitrogen compound metabolic process                                         | 3     | 0,89020772 | 0,21023125 | 0,004407847 |  |
| GO:0008645           | hexose transmembrane transport                                              | 8     | 0,89020772 | 0,22424667 | 0,005661371 |  |
| GO:0015755           | fructose transmembrane transport                                            | 9     | 0,89020772 | 0,22424667 | 0,005661371 |  |
| GO:0015761           | mannose transmembrane transport                                             | 9     | 0,89020772 | 0,22424667 | 0,005661371 |  |
| GO:0007131           | reciprocal meiotic recombination                                            | 4     | 1,78041543 | 0,70077085 | 0,008536277 |  |
| GO:0098704           | carbohydrate import across plasma membrane                                  | 7     | 0,89020772 | 0,25227751 | 0,008834229 |  |
| GO:0006974           | cellular response to DNA damage stimulus                                    | 5     | 5,04451039 | 2,94323756 | 0,010192854 |  |
| GO:0006493           | protein O-linked glycosylation                                              | 6     | 0,89020772 | 0,26629292 | 0,010781324 |  |
| GO:1904659           | glucose transmembrane transport                                             | 9     | 0,89020772 | 0,26629292 | 0,010781324 |  |
| GO:0006914           | autophagy                                                                   | 4     | 2,07715134 | 0,9110021  | 0,010955727 |  |
| GO:0006281           | DNA repair                                                                  | 6     | 4,45103858 | 2,57883672 | 0,013180765 |  |
| GO:0030437           | ascospore formation                                                         | 4     | 1,78041543 | 0,78486335 | 0,015586105 |  |
| GO:0000045           | autophagosome assembly                                                      | 6     | 0,89020772 | 0,35038542 | 0,028186284 |  |
| GO:0006303           | double-strand break repair via nonhomologous end joining                    | 8     | 0,89020772 | 0,40644709 | 0,045709211 |  |
| Upregulated genes.   |                                                                             |       |            |            |             |  |
| GO number            | GO category name                                                            | level | % sample   | % yeast    | p value     |  |
| GO:0055114           | oxidation-reduction process                                                 | 3     | 12,3809524 | 4,69516468 | 0,000363785 |  |
| GO:0055085           | transmembrane transport                                                     | 5     | 10,4761905 | 3,58794674 | 0,000352291 |  |
| GO:0008652           | cellular amino acid biosynthetic process                                    | 5     | 9,52380952 | 1,35949544 | 1,43E-07    |  |
| GO:0009086           | methionine biosynthetic process                                             | 7     | 5,71428571 | 0,46250876 | 3,81E-07    |  |
| GO:0034605           | cellular response to heat                                                   | 5     | 4,76190476 | 0,67274001 | 6,54E-05    |  |
| GO:0006457           | protein folding                                                             | 3     | 3,80952381 | 1,21934128 | 0,008927792 |  |
| GO:0071555           | cell wall organization                                                      | 4     | 3,80952381 | 1,30343378 | 0,011720384 |  |
| GO:0007155           | cell adhesion                                                               | 3     | 2,85714286 | 0,09810792 | 1,50E-06    |  |
| GO:0019344           | cysteine biosynthetic process                                               | 7     | 2,85714286 | 0,168185   | 2,00E-05    |  |
| GO:0071470           | cellular response to osmotic stress                                         | 5     | 2,85714286 | 0,19621584 | 3,96E-05    |  |
| GO:0000920           | septum digestion after cytokinesis                                          | 3     | 2,85714286 | 0,25227751 | 0,000115625 |  |
| GO:0000750           | pheromone-dependent signal transduction involved in cell-cell communication | 5     | 2,85714286 | 0,32235459 | 0,00031617  |  |
| GO:0019236           | response to pheromone                                                       | 5     | 2,85714286 | 0,43447793 | 0,001026374 |  |
| GO:0009058           | biosynthetic process                                                        | 3     | 2,85714286 | 0,44849334 | 0,001159845 |  |
| GO:0001403           | invasive growth in response to glucose limitation                           | 7     | 2,85714286 | 0,60266293 | 0,003517113 |  |
| GO:0007124           | pseudohyphal growth                                                         | 4     | 2,85714286 | 0,77084793 | 0,008498011 |  |

\*Results include categories with more than 3 genes and with a p value <0.05, GO level 1 is excluded  
GO analysis performed using YEASTRACT. Monteiro et al (2020)

**Supplementary Table 5.** Hits of the SGA screen which identified gene deletions that cause lethality of *KIN4* overexpression in *swr1Δ* background.

| ranking of the hit | Q2/Q1*     | ORF systematic name | standard name |
|--------------------|------------|---------------------|---------------|
| 1                  | 4,09876543 | YDR245W             | MNN10         |
| 2                  | 3,95659722 | YLR337C             | VRP1          |
| 3                  | 3,49665444 | YKR061W             | KTR2          |
| 4                  | 2,28566529 | YOL076W             | MDM20         |
| 5                  | 2,26702606 | YEL036C             | ANP1          |
| 6                  | 2,04469841 | YDR516C             | EMI2          |
| 7                  | 1,98636549 | YNL054W             | VAC7          |
| 8                  | 1,98333333 | YBR140C             | IRA1          |
| 9                  | 1,95535714 | YHR023W             | MYO1          |
| 10                 | 1,9534626  | YMR001c-A           | YMR001C-A     |
| 11                 | 1,94736842 | YGR135W             | PRE9          |
| 12                 | 1,92       | YGL066W             | SGF73         |
| 13                 | 1,81993355 | YDR458C             | HEH2          |
| 14                 | 1,80779221 | YFL018C             | LPD1          |
| 15                 | 1,79590229 | YBR019C             | GAL10         |
| 16                 | 1,77943925 | YHR030C             | SLT2          |
| 17                 | 1,70447318 | YOR195W             | SLK19         |
| 18                 | 1,69798475 | YMR267W             | PPA2          |
| 19                 | 1,64643949 | YHR152W             | SPO12         |
| 20                 | 1,64109731 | YDR427W             | RPN9          |
| 21                 | 1,63206181 | YDR448W             | ADA2          |
| 22                 | 1,63087607 | YMR231W             | PEP5          |
| 23                 | 1,60649638 | YJL095W             | BCK1          |
| 24                 | 1,59552303 | YMR144W             | YMR144W       |
| 25                 | 1,59223301 | YMR032W             | HOF1          |
| 26                 | 1,58245614 | YBR058C             | UBP14         |
| 27                 | 1,57647971 | YML115C             | VAN1          |
| 28                 | 1,56237817 | YCL010C             | SGF29         |
| 29                 | 1,55789086 | YLR079W             | SIC1          |
| 30                 | 1,55323419 | YKR048C             | NAP1          |
| 31                 | 1,55181936 | YBL061C             | SKT5          |
| 32                 | 1,53888813 | YER061C             | CEM1          |
| 33                 | 1,53222376 | YJR054W             | YJR054W       |
| 34                 | 1,5084473  | YKR042W             | UTH1          |
| 35                 | 1,5029838  | YLR331C             | JIP3          |
| 36                 | 1,49920388 | YDR340W             | YDR340W       |
| 37                 | 1,48997652 | YKL074C             | MUD2          |
| 38                 | 1,48469128 | YNL229C             | URE2          |
| 39                 | 1,48126673 | YBR023C             | CHS3          |
| 40                 | 1,47768879 | YLR332W             | MID2          |
| 41                 | 1,47138101 | YOR304W             | ISW2          |
| 42                 | 1,47016043 | YLR425W             | TUS1          |
| 43                 | 1,46885183 | YNL079C             | TPM1          |
| 44                 | 1,46862483 | YIL131C             | FKH1          |
| 45                 | 1,45204535 | YJL183W             | MNN11         |
| 46                 | 1,4505848  | YBR026C             | ETR1          |
| 47                 | 1,44831591 | YPL047W             | SGF11         |
| 48                 | 1,44346934 | YIL125W             | KGD1          |
| 49                 | 1,44224924 | YJR091C             | JSN1          |
| 50                 | 1,43177746 | YMR100W             | MUB1          |
| 51                 | 1,42342342 | YAL024C             | LTE1          |
| 52                 | 1,41667286 | YKL075C             | YKL075C       |
| 53                 | 1,41440041 | YEL007W             | YEL007W       |
| 54                 | 1,41407577 | YBR174C             | YBR174C       |
| 55                 | 1,41025641 | YBR200W             | BEM1          |
| 56                 | 1,39380531 | YLR006C             | SSK1          |
| 57                 | 1,38832508 | YJL099W             | CHS6          |
| 58                 | 1,38366013 | YER088C             | DOT6          |
| 59                 | 1,37777778 | YBR173C             | UMP1          |
| 60                 | 1,37585574 | YPL139C             | UME1          |
| 61                 | 1,36861479 | YBR058c-A           | TSC3          |
| 62                 | 1,36827273 | YLR371W             | ROM2          |
| 63                 | 1,36804916 | YML036W             | CGH121        |
| 64                 | 1,36752381 | YDR148C             | KGD2          |
| 65                 | 1,36715774 | YLR386W             | VAC14         |
| 66                 | 1,36686235 | YLR021W             | IRC25         |
| 67                 | 1,34852507 | YNL234W             | YNL234W       |
| 68                 | 1,34508772 | YAL010C             | MDM10         |
| 69                 | 1,34459627 | YLR319C             | BUD6          |

\*median colony size of *swr1Δ goiΔ* divided by median colony size of *GAL1-KIN4 swr1Δ goiΔ* on raffinose/galactose

Supplementary Table 6. Validation of the hits of the screen results presented in Supplementary Table 5

| the hit ranking of <i>goi</i> Δ | systematic name ORF GOI | name standard GOI | TESTED MANUALLY USING HOME MADE STRAINS                                                                         |                   |                                                          |
|---------------------------------|-------------------------|-------------------|-----------------------------------------------------------------------------------------------------------------|-------------------|----------------------------------------------------------|
|                                 |                         |                   | under <i>KIN4</i> overexpressing conditions <i>GAL1-KIN4 swr1</i> Δ <i>goi</i> Δ lethality of home-made strains | name standard GOI | <i>swr1</i> Δ <i>kar9</i> Δ <i>goi</i> Δ SPOC deficiency |
| 43                              | YNL079C                 | TPM1              | YES                                                                                                             | TPM1              | YES                                                      |
| 4                               | YOL076W                 | MDM20             | YES                                                                                                             | MDM20             | YES                                                      |
| 62                              | YLR371W                 | ROM2              | NO                                                                                                              | ROM2              | YES                                                      |
| 2                               | YLR337C                 | VRP1              | N/A                                                                                                             | VRP1              | YES                                                      |
| 65                              | YLR386W                 | VAC14             | YES                                                                                                             | VAC14             | YES                                                      |
| 7                               | YNL054W                 | VAC7              | YES                                                                                                             | VAC7              | YES                                                      |
| 31                              | YBL061C                 | SKT5              | YES                                                                                                             | SKT5              | YES                                                      |
| 51                              | YAL024C                 | LTE1              | YES                                                                                                             | LTE1              | YES                                                      |
| 48                              | YIL125W                 | KGD1              | YES                                                                                                             | KGD1              | YES                                                      |
| 6                               | YDR516C                 | EMI2              | NO                                                                                                              | EMI2              | YES                                                      |
| 14                              | YFL018C                 | LPD1              | YES                                                                                                             | LPD1              | YES                                                      |
| 39                              | YBR023C                 | CHS3              | YES                                                                                                             | CHS3              | YES                                                      |
| 25                              | YMR032W                 | HOF1              | YES                                                                                                             | HOF1              | YES                                                      |
| 9                               | YHR023W                 | MYO1              | NO                                                                                                              | MYO1              | YES                                                      |
| 28                              | YCL010C                 | SGF29             | YES                                                                                                             | SGF29             | YES                                                      |
| 69                              | YLR319C                 | BUD6              | YES                                                                                                             | BUD6              | YES                                                      |
| 30                              | YKR048C                 | NAP1              | YES                                                                                                             | NAP1              | YES                                                      |
| 58                              | YER088C                 | DOT6              | YES                                                                                                             | DOT6              | YES                                                      |
| 44                              | YIL131C                 | FKH1              | YES                                                                                                             | FKH1              | YES                                                      |
| 23                              | YJL095W                 | BCK1              | YES                                                                                                             | BCK1              | YES                                                      |
| 24                              | YMR144W                 | YMR144W           | YES                                                                                                             | YMR144W           | YES                                                      |
| 21                              | YDR448W                 | ADA2              | N/A                                                                                                             | ADA2              | YES                                                      |
| 1                               | YDR245W                 | MNN10             | YES                                                                                                             | MNN10             | YES                                                      |
| 34                              | YKR042W                 | UTH1              | YES                                                                                                             | UTH1              | YES                                                      |
| 60                              | YPL139C                 | UME1              | YES                                                                                                             | UME1              | YES                                                      |
| 16                              | YHR030C                 | SLT2              | YES                                                                                                             | SLT2              | REDUCED                                                  |
| 29                              | YLR079W                 | SIC1              | YES                                                                                                             | SIC1              | REDUCED                                                  |
| 12                              | YGL066W                 | SGF73             | YES                                                                                                             | SGF73             | NO                                                       |
| 17                              | YOR195W                 | SLK19             | YES                                                                                                             | SLK19             | NO                                                       |
| 11                              | YGR135W                 | PRE9              | YES                                                                                                             | PRE9              | NO                                                       |
| 19                              | YHR152W                 | SPO12             | YES                                                                                                             | SPO12             | NO                                                       |
| 3                               | YKR061W                 | KTR2              | N/A                                                                                                             | KTR2              | N/A                                                      |
| 5                               | YEL036C                 | ANP1              | YES                                                                                                             | ANP1              | N/A                                                      |
| 8                               | YBR140C                 | IRA1              | N/A                                                                                                             | IRA1              | N/A                                                      |
| 10                              | YMR001c-A               | YMR001C-A         | N/A                                                                                                             | YMR001C-A         | N/A                                                      |
| 13                              | YDR458C                 | HEH2              | N/A                                                                                                             | HEH2              | N/A                                                      |
| 15                              | YBR019C                 | GAL10             | N/A                                                                                                             | GAL10             | N/A                                                      |
| 18                              | YMR267W                 | PPA2              | N/A                                                                                                             | PPA2              | N/A                                                      |
| 20                              | YDR427W                 | RPN9              | N/A                                                                                                             | RPN9              | N/A                                                      |
| 22                              | YMR231W                 | PEP5              | N/A                                                                                                             | PEP5              | N/A                                                      |
| 26                              | YBR058C                 | UBP14             | N/A                                                                                                             | UBP14             | N/A                                                      |
| 27                              | YML115C                 | VAN1              | N/A                                                                                                             | VAN1              | N/A                                                      |
| 32                              | YER061C                 | CEM1              | N/A                                                                                                             | CEM1              | N/A                                                      |
| 33                              | YJR054W                 | YJR054W           | N/A                                                                                                             | YJR054W           | N/A                                                      |
| 35                              | YLR331C                 | JIP3              | N/A                                                                                                             | JIP3              | N/A                                                      |
| 36                              | YDR340W                 | YDR340W           | N/A                                                                                                             | YDR340W           | N/A                                                      |
| 37                              | YKL074C                 | MUD2              | N/A                                                                                                             | MUD2              | N/A                                                      |
| 38                              | YNL229C                 | URE2              | N/A                                                                                                             | URE2              | N/A                                                      |
| 40                              | YLR332W                 | MID2              | N/A                                                                                                             | MID2              | N/A                                                      |
| 41                              | YOR304W                 | ISW2              | N/A                                                                                                             | ISW2              | N/A                                                      |
| 42                              | YLR425W                 | TUS1              | N/A                                                                                                             | TUS1              | N/A                                                      |
| 45                              | YJL183W                 | MNN11             | N/A                                                                                                             | MNN11             | N/A                                                      |
| 46                              | YBR026C                 | ETR1              | N/A                                                                                                             | ETR1              | N/A                                                      |
| 47                              | YPL047W                 | SGF11             | YES                                                                                                             | SGF11             | N/A                                                      |
| 49                              | YJR091C                 | JSN1              | N/A                                                                                                             | JSN1              | N/A                                                      |
| 50                              | YMR100W                 | MUB1              | N/A                                                                                                             | MUB1              | N/A                                                      |
| 52                              | YKL075C                 | YKL075C           | N/A                                                                                                             | YKL075C           | N/A                                                      |
| 53                              | YEL007W                 | YEL007W           | N/A                                                                                                             | YEL007W           | N/A                                                      |
| 54                              | YBR174C                 | YBR174C           | N/A                                                                                                             | YBR174C           | N/A                                                      |
| 55                              | YBR200W                 | BEM1              | YES                                                                                                             | BEM1              | N/A                                                      |
| 56                              | YLR006C                 | SSK1              | N/A                                                                                                             | SSK1              | N/A                                                      |
| 57                              | YJL099W                 | CHS6              | N/A                                                                                                             | CHS6              | N/A                                                      |
| 59                              | YBR173C                 | UMP1              | N/A                                                                                                             | UMP1              | N/A                                                      |
| 61                              | YBR058c-A               | TSC3              | N/A                                                                                                             | TSC3              | N/A                                                      |
| 63                              | YML036W                 | CGI121            | N/A                                                                                                             | CGI121            | N/A                                                      |
| 64                              | YDR148C                 | KGD2              | N/A                                                                                                             | KGD2              | N/A                                                      |
| 66                              | YLR021W                 | IRC25             | N/A                                                                                                             | IRC25             | N/A                                                      |
| 67                              | YNL234W                 | YNL234W           | N/A                                                                                                             | YNL234W           | N/A                                                      |
| 68                              | YAL010C                 | MDM10             | N/A                                                                                                             | MDM10             | N/A                                                      |

**Supplementary Table 7.**Table of strains used in the study

| Strain Name | Description                                                                                            | Reference*                |
|-------------|--------------------------------------------------------------------------------------------------------|---------------------------|
| ESM356-1    | <i>MATa ura3-52 leu2Δ1 his3Δ200 trp1Δ63</i>                                                            | Pereira et al., 2001      |
| YPH499      | <i>MATa ura3-52 lys2-801 amber ade2-101 ochre trp1Δ63 his3Δ200 leu2Δ1</i>                              | Sikorski and Hieter, 1989 |
| Y8205       | <i>Mat alpha can1Δ::STE2pr-Sp_his5 lyp1Δ::STE3pr-LEU2 his3Δ1 leu2Δ0 ura3Δ0</i>                         | Tong and Boone, 2006      |
| AKY184-1    | <i>ESM356-1 SPC42-EQFP611-KanMX6 Nat-GAL1-GFP-KIN4 ura3::pMET25-KIN4 yaf9Δ::kITRP.</i>                 | This study                |
| AKY185-1    | <i>ESM356-1 SPC42-EQFP611-KanMX6 Nat-GAL1-GFP-KIN4 ura3::pMET25-KIN4 swc2Δ::kITRP.</i>                 | This study                |
| AKY186-1    | <i>ESM356-1 SPC42-EQFP611-KanMX6 Nat-GAL1-GFP-KIN4 ura3::pMET25-KIN4 swc3Δ::kITRP.</i>                 | This study                |
| AKY187-1    | <i>ESM356-1 SPC42-EQFP611-KanMX6 Nat-GAL1-GFP-KIN4 ura3::pMET25-KIN4 swc6Δ::kITRP.</i>                 | This study                |
| AKY188-1    | <i>ESM356-1 SPC42-EQFP611-KanMX6 Nat-GAL1-GFP-KIN4 ura3::pMET25-KIN4 swc5Δ::kITRP</i>                  | This study                |
| UJY037-3    | <i>ESM356-1 SPC42-EQFP611-KanMX6 Nat-GAL1-GFP-KIN4 ura3::pMET25-KIN4 swr1Δ::kITRP1</i>                 | This study                |
| AKY301-1    | <i>ESM356-1 SPC42-EQFP611-KanMX6 Nat-GAL1-GFP-KIN4 ura3::pMET25-KIN4 nph10Δ::kITRP1</i>                | This study                |
| AKY302-1    | <i>ESM356-1 SPC42-EQFP611-KanMX6 Nat-GAL1-GFP-KIN4 ura3::pMET25-KIN4 ies3Δ::kITRP1</i>                 | This study                |
| UJY011-4    | <i>ESM356-1 SPC42-EQFP611-KanMX6 Nat-GAL1-GFP-KIN4 ura3::pMET25-KIN4.</i>                              | Caydasi et al., 2010      |
| UJY013-2    | <i>ESM356-1 SPC42-EQFP611-KanMX6 Nat-GAL1-GFP-KIN4 ura3::pMET25-KIN4 bfa1Δ::kITRP1</i>                 | Caydasi et al., 2010      |
| UJY014-1    | <i>ESM356-1 SPC42-EQFP611-KanMX6 Nat-GAL1-GFP-KIN4 ura3::pMET25-KIN4 bub2Δ::hphNT1</i>                 | Caydasi et al., 2010      |
| AKY1052-1   | <i>ESM356-1 SPC42-EQFP611-KanMX6 Nat-GAL1-GFP-KIN4 ura3::pMET25-KIN4 sir2Δ::his3MX6</i>                | This study                |
| AKY1053-1   | <i>ESM356-1 SPC42-EQFP611-KanMX6 Nat-GAL1-GFP-KIN4 ura3::pMET25-KIN4 swr1Δ::kITRP1 sir2Δ::his3MX6</i>  | This study                |
| AKY1044-1   | <i>ESM356-1 SPC42-EQFP611-KanMX6 Nat-GAL1-GFP-KIN4 ura3::pMET25-KIN4 yku80Δ::his3MX6</i>               | This study                |
| AKY1045-1   | <i>ESM356-1 SPC42-EQFP611-KanMX6 Nat-GAL1-GFP-KIN4 ura3::pMET25-KIN4 swr1Δ::kITRP1 yku80Δ::his3MX6</i> | This study                |
| AKY419-1    | <i>ESM356-5 BFA1-3HA-His3MX6 swr1Δ::kanMX6</i>                                                         | This study                |
| AKY417-1    | <i>ESM356-5 BFA1-3HA-His3MX6 kin4Δ::kanMX6</i>                                                         | Caydasi et al., 2010      |
| GPY1070-1   | <i>ESM356-5 BFA1-3HA-His3MX6</i>                                                                       | Caydasi et al., 2010      |
| AKY092-1    | <i>ESM356-1 BFA1-GFP-KanMX6 SPC42-eqFP-hphNT1 kar9Δ::kITRP1 swr1Δ::his3MX6</i>                         | This study                |
| GPY1033     | <i>ESM356-1 KIN4-GFP-His3MX6 SPC42-eqFP-natNT2</i>                                                     | Pereira and Schiebel 2005 |
| AKY404-1    | <i>ESM356-1 KIN4-GFP-His3MX6 SPC42-eqFP-natNT2 rts1Δ::kITRP1</i>                                       | Caydasi et al., 2010      |
| AKY403-1    | <i>ESM356-1 KIN4-GFP-His3MX6 SPC42-eqFP-natNT2 swr1Δ::kITRP1</i>                                       | This study                |
| AKY477-1    | <i>ESM356-1 KIN4-T209A-6HA-kanMX6-LEU2-kin4BΔ::his3MX6</i>                                             | This study                |
| AKY413-1    | <i>ESM356-1 KIN4-6HA-hphNT1 swr1Δ::kITRP1</i>                                                          | This study                |
| ESM2326-1   | <i>ESM356-1 KIN4-6HA-hphNT1</i>                                                                        | Caydasi et al., 2010      |
| AKY1729-1   | <i>ESM356-1 PDS1-3HA-his3MX6</i>                                                                       | Caydasi et al., 2014      |
| AKY1730-1   | <i>ESM356-1 bub2Δ::kITRP PDS1-3HA-his3MX6</i>                                                          | This study                |
| AKY1731-1   | <i>ESM356-1 swr1Δ::kITRP1 PDS1-3HA-his3MX6</i>                                                         | This study                |
| DLY47-1     | <i>ESM356-1 kin4Δ:: kITRP1</i>                                                                         | Caydasi et al., 2010      |
| AKY1732-1   | <i>ESM356-1 kin4Δ:: kITRP1 PDS1-3HA-his3MX6</i>                                                        | Caydasi et al., 2014      |
| AKY308-1    | <i>ESM356-1 swr1Δ::kITRP1</i>                                                                          | This study                |
| AKY312-1    | <i>ESM356-1 bub2Δ::kITRP1</i>                                                                          | Caydasi et al., 2010      |
| AKY1464-1   | <i>YPH499 ura3::URA3-GAL1-KIN4</i>                                                                     | This study                |
| AKY1465-1   | <i>YPH499 dbf2-2 ura3::URA3-GAL1-KIN4</i>                                                              | This study                |
| AKY1466-1   | <i>YPH499 mob1-67 ura3::URA3-GAL1-KIN4</i>                                                             | This study                |

|           |                                                                                              |                      |
|-----------|----------------------------------------------------------------------------------------------|----------------------|
| AKY1467-1 | YPH499 <i>cdc15-1 ura3::URA3-GAL1-KIN4</i>                                                   | This study           |
| AKY1468-1 | YPH499 <i>cdc14-2 ura3::URA3-GAL1-KIN4</i>                                                   | This study           |
| AKY1469-1 | YPH499 <i>tem1-3 ura3::URA3-GAL1-KIN4</i>                                                    | This study           |
| AKY1505-1 | YPH499 <i>ura3::URA3-GAL1-KIN4 swr1Δ::kITRP1</i>                                             | This study           |
| AKY1502-1 | YPH499 <i>ura3::URA3-GAL1-KIN4 bub2Δ::kITRP1</i>                                             | This study           |
| AKY1507-1 | YPH499 <i>dbf2-2 ura3::URA3-GAL1-KIN4 bub2Δ::kITRP1</i>                                      | This study           |
| AKY1508-1 | YPH499 <i>dbf2-2 ura3::URA3-GAL1-KIN4 swr1Δ::kITRP1</i>                                      | This study           |
| AKY1510-1 | YPH499 <i>mob1-67 ura3::URA3-GAL1-KIN4 bub2Δ::kITRP1</i>                                     | This study           |
| AKY1511-1 | YPH499 <i>mob1-67 ura3::URA3-GAL1-KIN4 swr1Δ::kITRP1</i>                                     | This study           |
| AKY1513-1 | YPH499 <i>cdc15-1 ura3::URA3-GAL1-KIN4 bub2Δ::kITRP1</i>                                     | This study           |
| AKY1516-1 | YPH499 <i>cdc15-1 ura3::URA3-GAL1-KIN4 swr1Δ::kITRP1</i>                                     | This study           |
| AKY1517-1 | YPH499 <i>cdc14-2 ura3::URA3-GAL1-KIN4 bub2Δ::kITRP1</i>                                     | This study           |
| AKY1520-1 | YPH499 <i>cdc14-2 ura3::URA3-GAL1-KIN4 swr1Δ::kITRP1</i>                                     | This study           |
| AKY1521-1 | YPH499 <i>tem1-3 ura3::URA3-GAL1-KIN4 bub2Δ::kITRP1</i>                                      | This study           |
| AKY1524-1 | YPH499 <i>tem1-3 ura3::URA3-GAL1-KIN4 swr1Δ::kITRP1</i>                                      | This study           |
| ESM1249-1 | YPH499 <i>tem1-3</i>                                                                         | Caydasi et al., 2017 |
| ESM1276-1 | YPH499 <i>cdc14-2</i>                                                                        | Caydasi et al., 2017 |
| ESM1278-1 | YPH499 <i>cdc15-1</i>                                                                        | Caydasi et al., 2017 |
| CVY16-1   | YPH499 <i>cdc14-1</i>                                                                        | Caydasi et al., 2017 |
| ESM1309-1 | YPH499 <i>dbf2-2</i>                                                                         | Caydasi et al., 2017 |
| ESM1361-1 | YPH499 <i>mob1-67</i>                                                                        | Caydasi et al., 2017 |
| AKY1460-1 | YPH499 <i>swr1Δ::kITRP1</i>                                                                  | This study           |
| AKY508-1  | YPH499 <i>cdc14-2 swr1Δ::his3MX6</i>                                                         | This study           |
| AKY509-1  | YPH499 <i>tem1-3 swr1Δ::his3MX6</i>                                                          | This study           |
| AKY510-1  | YPH499 <i>cdc15-1 swr1Δ::his3MX6</i>                                                         | This study           |
| AKY511-1  | YPH499 <i>cdc14-1 swr1Δ::his3MX6</i>                                                         | This study           |
| AKY1462-1 | YPH499 <i>dbf2-2 swr1Δ::his3MX6</i>                                                          | This study           |
| AKY1463-1 | YPH499 <i>mob1-67 swr1Δ::his3MX6</i>                                                         | This study           |
| AKY1608-1 | ESM356-1 <i>CDC14-GFP-kanMX6 MYO1-3Cherry-hphNT1 kar9Δ::kITRP1</i>                           | This study           |
| AKY1610-1 | ESM356-1 <i>CDC14-GFP-kanMX6 MYO1-3Cherry-hphNT1 swr1Δ::kITRP1pRS316-KAR9 kar9Δ::his3MX6</i> | This study           |
| AKY1611-1 | YPH499 <i>cdc15-1 CDC14-GFP-hphNT1</i>                                                       | This study           |
| AKY1612-1 | YPH499 <i>cdc15-1 swr1Δ::His3MX6 CDC14-GFP-hphNT1</i>                                        | This study           |
| AKY1641-1 | YPH499 <i>cdc15-1 swr1Δ::His3MX6 CDC14-GFP-hphNT1 ura3::URA3-mCherry-TUB1</i>                | This study           |
| AKY1642-1 | YPH499 <i>cdc15-1 CDC14-GFP-hphNT ura3::URA3-mCherry-TUB1</i>                                | This study           |
| AKY1643-1 | YPH499 <i>cdc15-1 CDC14-GFP-hphNT ura3::URA3-mCherry-TUB1 swr1Δ::his3MX6</i>                 | This study           |
| AKY1644-1 | YPH499 <i>cdc15-1 CDC14-GFP-hphNT ura3::URA3-mCherry-TUB1 spo12Δ::his3MX6</i>                | This study           |
| AKY346-1  | YPH499 <i>kar9Δ::kITRP1 pRS316-KAR9 ade2::ADE2-GFP-TUB1</i>                                  | Caydasi et al., 2014 |
| AKY351-1  | YPH499 <i>kar9Δ::kITRP1 pRS316-KAR9 kin4Δ::his3MX6 ade2::ADE2-GFP-TUB1</i>                   | Caydasi et al., 2014 |
| AKY354-1  | YPH499 <i>kar9Δ::kITRP1 pRS316-KAR9 swr1Δ::his3MX6 ade2::ADE2-GFP-TUB1</i>                   | This study           |
| AKY741-1  | YPH499 <i>cdc15-1 ade2::ADE2-GFP-TUB1 kin4Δ::his3MX6</i>                                     | This study           |

|           |                                                                                             |                       |
|-----------|---------------------------------------------------------------------------------------------|-----------------------|
| AKY745-1  | YPH499 <i>cdc15-1 ade2::ADE2-GFP-TUB1 swr1Δ::his3MX6</i>                                    | This study            |
| AKY690-1  | YPH499 <i>cdc15-1 ade2::ADE2-GFP-TUB1</i>                                                   | This study            |
| TAY258    | YPH499 <i>ura3::URA3-GFP-TUB1</i>                                                           | This study            |
| AKY1907   | YPH499 <i>kar9Δ::klTRP1 pRS316-KAR9 kin4Δ::his3MX6 ade2::ADE2-GFP-TUB1 slt2Δ::hphNT1</i>    | This study            |
| AKY1809-1 | YPH499 <i>kar9Δ::klTRP1 pRS316-KAR9 kin4Δ::his3MX6 ade2::ADE2-GFP-TUB1 sgf73Δ::natNT2</i>   | This study            |
| AKY3076-1 | YPH499 <i>kar9Δ::klTRP1 pRS316-KAR9 kin4Δ::his3MX6 ade2::ADE2-GFP-TUB1 pre9Δ::hphNT1</i>    | This study            |
| AKY2979-1 | YPH499 <i>kar9Δ::klTRP1 pRS316-KAR9 kin4Δ::his3MX6 ade2::ADE2-GFP-TUB1 sic1Δ::natNT1</i>    | This study            |
| AKY1279   | YPH499 <i>kar9Δ::klTRP1 pRS316-KAR9 kin4Δ::his ade2::ADE2-GFP-TUB1 spo12Δ::hphNT1</i>       | This study            |
| AKY1321-1 | YPH499 <i>kar9Δ::klTRP1 pRS316-KAR9 kin4Δ::his3MX6 ade2::ADE2-GFP-TUB1 slk19Δ::hphNT1</i>   | This study            |
| ESM356-5  | <i>MATa ura3-52 his3Δ200</i>                                                                | Bertazzi et al., 2011 |
| AKY1296   | Y8205 <i>ura3Δ::URA3-GAL1-KIN4</i>                                                          | This study            |
| AKY1307   | Y8205 <i>ura3Δ::URA3-GAL1-KIN4 swr1Δ::hphNT1</i>                                            | This study            |
| AKY1346   | Y8205 <i>swr1Δ::hphNT1</i>                                                                  | This study            |
| AKY1733   | YPH499 <i>cdc15-1 Sli15-GFP-klTRP1 ura3::URA3-mcherry-TUB1</i>                              | This study            |
| AKY1734   | YPH499 <i>cdc15-1 Sli15-GFP-klTRP1 spo12Δ::His3MX6 ura3::URA3-mcherry-TUB1</i>              | This study            |
| AKY1751   | YPH499 <i>cdc15-1 Sli15-GFP-klTRP1 ura3::URA3-mcherry-TUB1 swr1Δ::his3MX6</i>               | This study            |
| AKY1300   | ESM356-1 <i>His3MX6-GAL1-3HA-KIN4 cdc15-as</i>                                              | This study            |
| AKY1313   | ESM356-1 <i>His3MX6-GAL1-3HA-KIN4 cdc15-as swr1Δ::kanMX6</i>                                | This study            |
| AKY3076-1 | YPH499 <i>kar9Δ::klTRP1 pRS316-KAR9 kin4Δ::his3MX6 ade2::ADE2-GFP-TUB1 pre9Δ::hphNT1</i>    | This study            |
| AKY2979-1 | YPH499 <i>kar9Δ::klTRP1 pRS316-KAR9 kin4Δ::his3MX6 ade2::ADE2-GFP-TUB1 sic1Δ::natNT1</i>    | This study            |
| AKY1809-1 | YPH499 <i>kar9Δ::klTRP1 pRS316-KAR9 kin4Δ::his3MX6 ade2::ADE2-GFP-TUB1 sgf73Δ::natNT1</i>   | This study            |
| AKY1907   | YPH499 <i>kar9Δ::klTRP1 pRS316-KAR9 kin4Δ::his3MX6 ade2::ADE2-GFP-TUB1 slt2Δ::hphNT1</i>    | This study            |
| AKY1279-1 | YPH499 <i>kar9Δ::klTRP1 pRS316-KAR9 kin4Δ::his3MX6 ade2::ADE2-GFP-TUB1 spo12Δ::hphNT1</i>   | Caydasi et al., 2017  |
| AKY1321-1 | YPH499 <i>kar9Δ::klTRP1 pRS316-KAR9 kin4Δ::his3MX6 ade2::ADE2-GFP-TUB1 slk19Δ::hphNT1</i>   | Caydasi et al., 2017  |
| SHY40-1   | ESM356-1 <i>gas1Δ::klTRP1</i>                                                               | This study            |
| AKY1791-1 | ESM356-1 <i>leu2::LEU2-GAL1-KIN4 swr1Δ::klTRP1</i>                                          | This study            |
| AKY1533   | ESM356-1 <i>leu2::LEU2-GAL1-KIN4</i>                                                        | This study            |
| MFY1611-1 | ESM356-1 <i>slt2Δ::klTRP1</i>                                                               | This study            |
| BKY1012   | YPH499 <i>cdc15-1 CDC14-GFP-hphNT ura3::URA3-mCherry-TUB1 sir2Δ::klTRP1</i>                 | This study            |
| BKY1013   | YPH499 <i>cdc15-1 CDC14-GFP-hphNT ura3::URA3-mCherry-TUB1 spo12Δ::his3MX6 sir2Δ::klTRP1</i> | This study            |
| BKY1007   | YPH499 <i>kar9Δ::klTRP1 pRS316-KAR9 swr1Δ::his3MX6 ade2::ADE2-GFP-TUB1 sir2Δ::hphNT1</i>    | This study            |
| BKY1008   | YPH499 <i>kar9Δ::klTRP1 pRS316-KAR9 ade2::ADE2-GFP-TUB1 yku80Δ::hphNT1</i>                  | This study            |

#### \* References

- Bertazzi DT, Kurtulmus B, Pereira G (2011) The cortical protein Lte1 promotes mitotic exit by inhibiting the spindle position checkpoint kinase Kin4. *J Cell Biol* 193: 1033-1048.
- Caydasi AK, Kurtulmus B, Orrico MIL, Hofmann A, Ibrahim B, et al. (2010) Elm1 kinase activates the spindle position checkpoint kinase Kin4. *Journal of Cell Biology* 190: 975-989.
- Caydasi AK, Khmelinskii A, Duenas-Sanchez R, Kurtulmus B, Knop M, et al. (2017) Temporal and compartment-specific signals coordinate mitotic exit with spindle position. *Nat Commun* 8: 14129.
- Caydasi AK, Micoogullari Y, Kurtulmus B, Palani S, Pereira G (2014) The 14-3-3 protein Bmh1 functions in the spindle position checkpoint by breaking Bfa1 asymmetry at yeast centrosomes. *Mol Biol Cell* 25: 2143-2151
- Pereira G, Schiebel E (2001) The role of the yeast spindle pole body and the mammalian centrosome in regulating late mitotic events. *Curr Opin Cell Biol* 13: 762-769.
- Pereira G, Schiebel E (2005) Kin4 kinase delays mitotic exit in response to spindle alignment defects. *Mol Cell* 19: 209-221.
- Sikorski, RS and Hieter, P (1989) A system of shuffle vectors and yeast host strains designed for efficient manipulation of DNA in *Saccharomyces cerevisiae*. *Genetics* 122:19-27.
- Tong AH, Boone C (2006) Synthetic genetic array analysis in *Saccharomyces cerevisiae*. *Methods Mol Biol*.313:171-92.
